# Supplementary material
Source: PubMed Central journal article supplement (PMC1172246)

Side scatter ↑

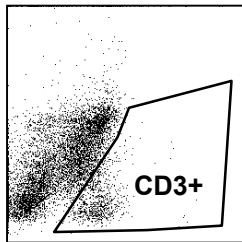

CD3 →

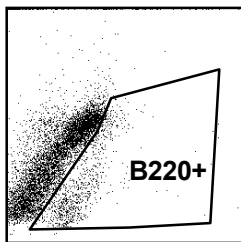

B220 →

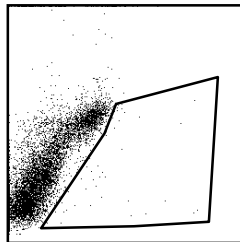

IC →

Supplement: pnas_0501794102_1.pdf [file pnas_0501794102_1.pdf]

**A**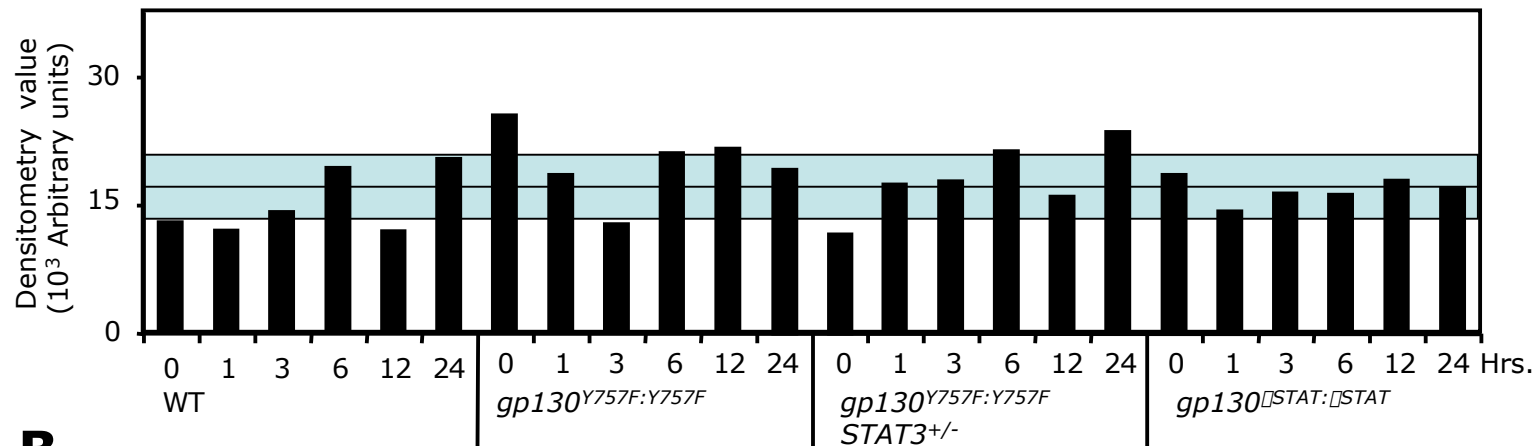**B**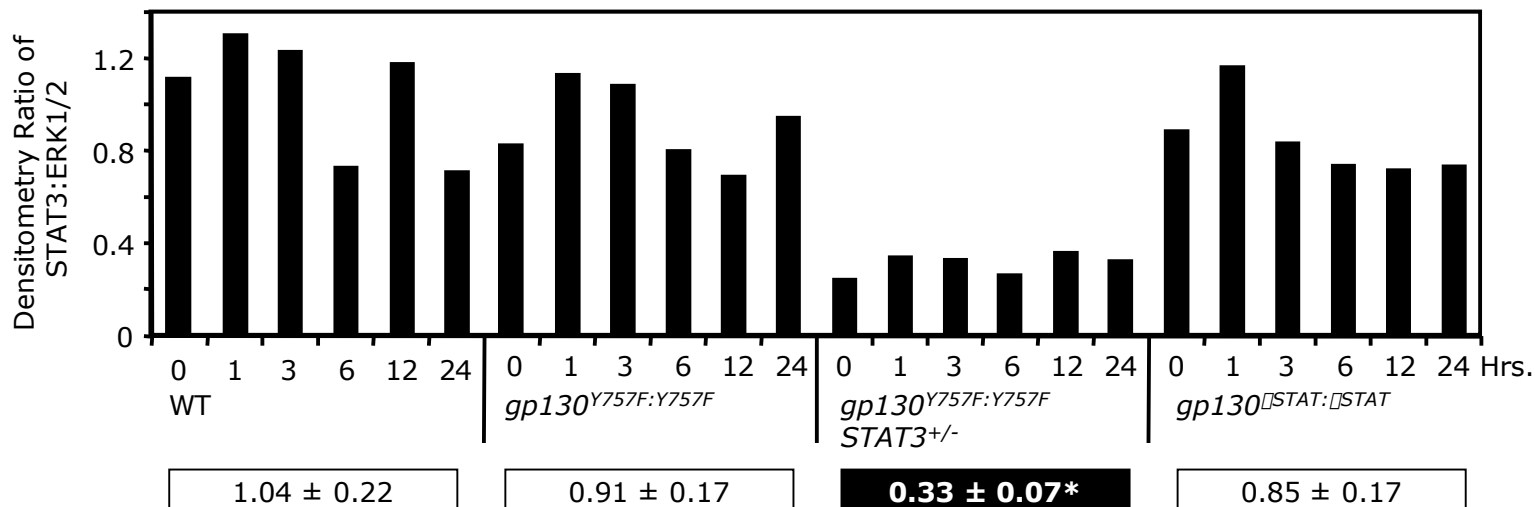

Supplement: pnas_0501794102_2.pdf [file pnas_0501794102_2.pdf]
